# Supplementary material
Source: MDPI journal article supplement (https://www.mdpi.com/2073-4352/9/7/370)
Supplement: s1 [file s1]

# Supplementary Information of

## “Systematic Designing of Crystal Structure for Hofmann-like Spin Crossover Complexes $\text{Fe(L)}_2[\text{Ag(CN)}_2]_2$ “

**Takashi Kosone <sup>1,\*</sup>, Yoshinori Makido <sup>2</sup>, Syogo Okuda <sup>3</sup>, Ayaka Haigo <sup>3</sup>, Takeshi Kawasaki <sup>2</sup>, Daisuke Akahoshi <sup>4</sup>, Toshiaki Saito <sup>4</sup> and Takafumi Kitazawa <sup>2</sup>**

<sup>1</sup> Department of Science and Engineering, Graduate School of Science and Engineering, Tokyo Denki University, Hatoyama, Hiki-gun, Saitama, 350-0394, Japan

<sup>2</sup> Department of Chemistry, Faculty of Science, Toho University, 2-2-1 Miyama, Funabashi, Chiba 274-8510, Japan; kitazawa@chem.sci.toho-u.ac.jp

<sup>3</sup> Department of Creative Technology Engineering Course of Chemical Engineering, Anan College, 265 Aoki, Minobayashi, Anan, Tokushima 774-0017, Japan

<sup>4</sup> Department of Physics, Faculty of Science, Toho University, 2-2-1, Miyama 274-8510, Japan

\* Correspondence: t-kosone@mail.dendai.ac.jp; Tel.: +81-49-296-2923

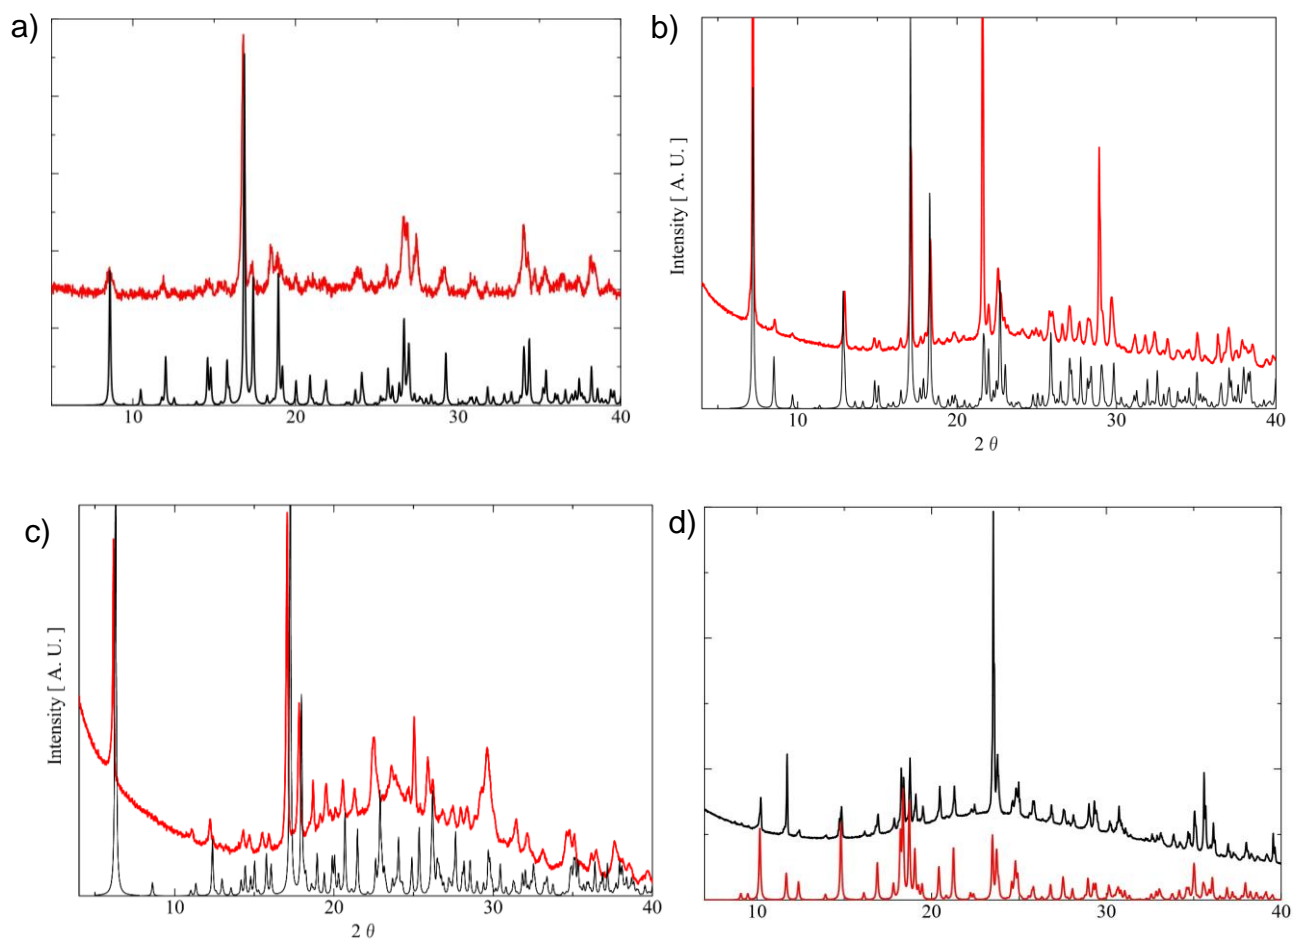

**Figure. S1.** X-ray Powder diffraction (red line) and simulation powder pattern (black line) for **1** (a), **2** (b), **3** (c) and **4** (d).

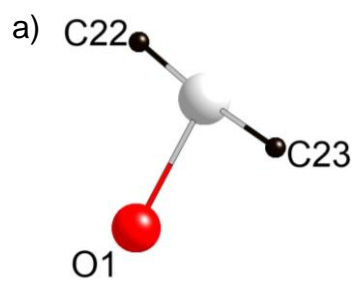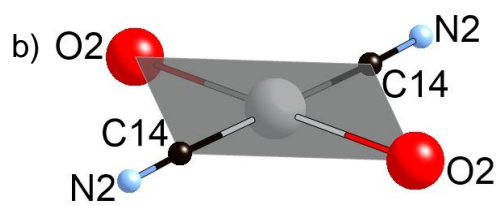

**Scheme S2.** Coordination environment of Ag(I) ion for **2** (a) and **4** (b).
